# Supplementary material for: The association of weight gain with nonalcoholic fatty liver disease and fibrosis detected by FibroScan in the United States
Source: PubMed Central journal article supplement — Ann Gastroenterol. 2022 Feb 15;35(2):194–202. doi: 10.20524/aog.2022.0687 (PMC8922259; doi:10.20524/aog.2022.0687), 2022-02-15
Supplement: AnnGastroenterol-35-194_Suppl1.pdf [file AnnGastroenterol-35-194_Suppl1.pdf]

## Supplementary material

**Supplementary Table 1** Characteristics of the study population according to weight changes over 1 year

| Characteristics                              | Quartiles of weight change |                     |                     |                     | P-value |
|----------------------------------------------|----------------------------|---------------------|---------------------|---------------------|---------|
|                                              | Quartile 1                 | Quartile 2          | Quartile 3          | Quartile 4          |         |
| Age (years)                                  | 56.7±0.7                   | 58.4±1.0            | 57.2±0.6            | 54.2±0.7            | 0.025   |
| Sex (% men)                                  | 43.7<br>(37.5-50.1)        | 50.0<br>(39.3-60.7) | 49.9<br>(44.1-55.8) | 41.0<br>(35.0-47.4) | 0.192   |
| Body mass index (kg/m <sup>2</sup> )         | 30.4±0.5                   | 26.8±0.6            | 29.2±0.4            | 31.1±0.4            | 0.309   |
| Waist circumference (cm)                     | 103.6±1.1                  | 96.6±1.6            | 100.5±1.0           | 104.5±1.0           | 0.630   |
| Hypertension (%)                             | 48.0<br>(40.1-56.0)        | 36.6<br>(25.6-49.2) | 43.1<br>(37.0-49.4) | 44.0<br>(37.5-50.8) | 0.377   |
| Diabetes (%)                                 | 26.0<br>(21.2-31.4)        | 16.1<br>(10.7-23.6) | 17.6<br>(14.3-21.6) | 14.4<br>(10.5-19.4) | 0.006   |
| Ethnicity (%)                                |                            |                     |                     |                     | <0.001  |
| Non-Hispanic White                           | 59.9<br>(52.0-67.4)        | 68.8<br>(59.7-76.7) | 71.4<br>(63.5-78.2) | 61.4<br>(53.0-69.2) |         |
| Non-Hispanic Black                           | 12.3<br>(9.0-16.6)         | 8.6<br>(4.7-15.5)   | 7.6<br>(5.1-11.2)   | 13.8<br>(9.5-19.7)  |         |
| Hispanic                                     | 16.2<br>(12.7-20.5)        | 10.9<br>(6.5-17.7)  | 11.0<br>(7.7-15.4)  | 15.6<br>(12.0-20.0) |         |
| Non-Hispanic Asian                           | 3.3<br>(2.2-4.8)           | 9.8<br>(5.9-15.9)   | 7.1<br>(4.5-10.9)   | 5.1<br>(3.5-7.4)    |         |
| Other                                        | 8.3<br>(4.7-14.1)          | 1.8<br>(0.8-4.3)    | 3.0<br>(2.0-4.4)    | 4.1<br>(2.7-6.2)    |         |
| Smoking (%)                                  |                            |                     |                     |                     | 0.036   |
| Never                                        | 51.2<br>(44.8-57.6)        | 68.0<br>(57.7-76.5) | 60.1<br>(55.2-64.8) | 57.1<br>(52.1-61.9) |         |
| Current smoker                               | 29.8<br>(25.3-34.9)        | 25.5<br>(17.8-35.0) | 27.6<br>(24.3-31.1) | 30.2<br>(24.0-37.2) |         |
| Former smoker                                | 19.0<br>(14.7-24.2)        | 6.7<br>(3.3-13.2)   | 12.4<br>(9.7-15.7)  | 12.8<br>(9.2-17.5)  |         |
| High education (%)                           | 88.1<br>(84.4-91.0)        | 90.9<br>(85.8-94.3) | 89.1<br>(86.2-91.5) | 89.3<br>(85.3-92.3) | 0.734   |
| Married (%)                                  | 64.0<br>(57.2-70.3)        | 69.7<br>(59.7-78.2) | 74.0<br>(71.0-76.9) | 68.0<br>(62.5-73.0) | 0.028   |
| Total cholesterol (mg/dL)                    | 190.2±2.8                  | 194.7±4.3           | 195.5±2.0           | 202.0±2.5           | 0.009   |
| High-density lipoprotein cholesterol (mg/dL) | 53.1±0.9                   | 55.8±1.6            | 54.3±1.0            | 53.6±1.0            | 0.802   |
| Triglyceride (mg/dL)                         | 114.8±4.4                  | 115.5±14.0          | 115.9±6.7           | 134.9±9.3           | 0.078   |
| Fasting glucose (mg/dL)                      | 114.8±2.4                  | 111.9±3.0           | 115.6±3.1           | 109.2±1.6           | 0.214   |
| Hemoglobin A1c (%)                           | 5.90±0.05                  | 5.78±0.08           | 5.83±0.04           | 5.74±0.02           | 0.007   |
| Fasting insulin (pmol/L)                     | 93.3±10.3                  | 64.2±7.1            | 67.0±3.1            | 85.5±6.8            | 0.343   |
| Alanine aminotransferase (IU/L)              | 20.3±0.5                   | 21.3±1.0            | 21.2±0.6            | 23.5±0.5            | 0.005   |
| Aspartate aminotransferase (IU/L)            | 20.5±0.3                   | 20.8±0.5            | 21.1±0.3            | 21.9±0.4            | 0.019   |
| Gamma glutamyl transferase (IU/L)            | 27.7±1.1                   | 26.0±2.1            | 27.7±1.3            | 29.9±1.0            | 0.149   |
| NAFLD (CAP ≥263 dB/m, %)                     | 55.1<br>(49.5-60.5)        | 38.6<br>(28.5-49.7) | 50.9<br>(45.0-56.8) | 65.9<br>(59.7-71.5) | <0.001  |
| NAFLD (CAP ≥285 dB/m, %)                     | 40.9<br>(33.8-48.4)        | 27.6<br>(19.4-37.7) | 37.0<br>(33.1-41.0) | 48.5<br>(41.0-56.0) | 0.004   |
| Significant fibrosis (≥F2, %)                | 9.7<br>(6.9-13.4)          | 5.5<br>(3.0-9.9)    | 7.0<br>(5.2-9.3)    | 11.6<br>(8.2-16.1)  | 0.038   |

Data are shown as the weighted mean ± standard error or weighted frequency (95% confidence interval) as appropriate

Triglycerides, fasting glucose, fasting insulin were calculated from fasting subjects only

Range of quartile 1, <-5 pounds (-2.27 kg); quartile 2, -5 pounds (-2.27 kg) to 0 pounds; quartile 3, 0 pounds to 4 pounds (1.81 kg); and quartile 4, ≥4 pounds (1.81 kg)

CAP, controlled attenuation parameter; NAFLD, nonalcoholic fatty liver disease
